# Supplementary material
Source: Springer Nature journal article supplement (https://www.springermedizin.de/resource/supplementary/12935_2014_541_MOESM1_ESM.pdf/9540812)

**A****24 h**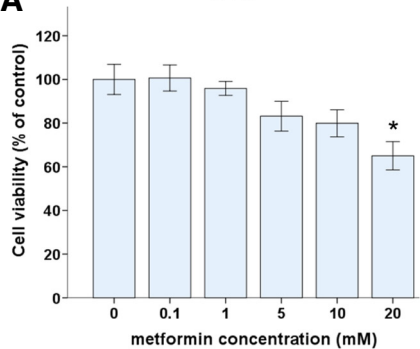**48 h**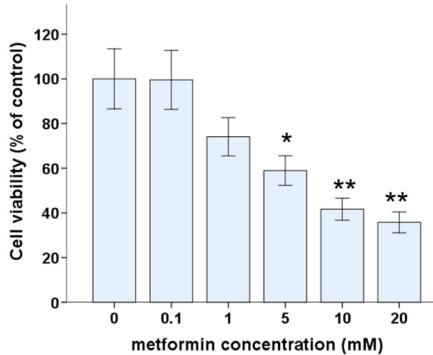**B**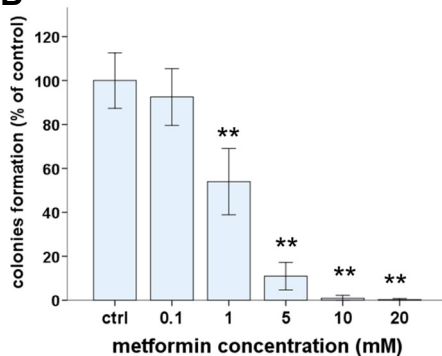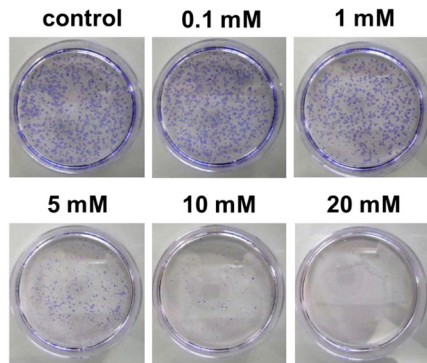

Supplement: MOESM1 [file 9540812]
